# Supplementary material for: Enhancing charge-storage capacity of non-volatile memory devices using template-directed assembly of gold nanoparticles
Source: Royal Society of Chemistry journal article supplement (doi:10.1039/c2nr12134d), 2012-01-01
Supplement: c2nr12134d.pdf [file c2nr12134d.pdf]

# Enhancing Charge-Storage Capacity of Non-volatile Memory Device Using Template-Directed Assembly of Gold Nanoparticles

**Raju Kumar Gupta,<sup>a</sup> Sivashankar Krishnamoorthy,<sup>\*b</sup> Damar Yoga  
Kusuma,<sup>c</sup> Pooi See Lee<sup>c</sup> and M. P. Srinivasan<sup>\*a</sup>**

<sup>a</sup> *Department of Chemical and Biomolecular Engineering, National University of Singapore, 4 Engineering Drive 4, 117576 (Singapore). Fax: +65 67791936; Tel: +65 65162171*

<sup>b</sup> *Institute of Materials Research and Engineering, 3, Research Link, 117602 (Singapore)*

<sup>c</sup> *School of Materials Science and Engineering, Nanyang Technological University, 50 Nanyang Avenue, 639798 (Singapore)*

*\*Corresponding email: chesmp@nus.edu.sg (M. P. Srinivasan)*

*krishnamoorthys@imre.a-star.edu.sg (Sivashankar Krishnamoorthy)*

## Electronic Supplementary Information (ESI)

### Enhancing Charge-Storage Capacity of Non-volatile Memory Device Using Template-Directed Assembly of Gold Nanoparticles

Raju Kumar Gupta,<sup>a</sup> Sivashankar Krishnamoorthy,<sup>\*b</sup> Damar Yoga Kusuma,<sup>c</sup> Pooi See Lee<sup>c</sup> and M. P. Srinivasan<sup>\*a</sup>

<sup>a</sup> Department of Chemical and Biomolecular Engineering, National University of Singapore, 4 Engineering Drive 4, 117576 (Singapore). Fax: +65 67791936; Tel: +65 65162171; E-mail: chesmp@nus.edu.sg

<sup>b</sup> Institute of Materials Research and Engineering, 3, Research Link, 117602 (Singapore); E-mail: krishnamoorthys@imre.a-star.edu.sg

<sup>c</sup> School of Materials Science and Engineering, Nanyang Technological University, 50 Nanyang Avenue, 639798 (Singapore)

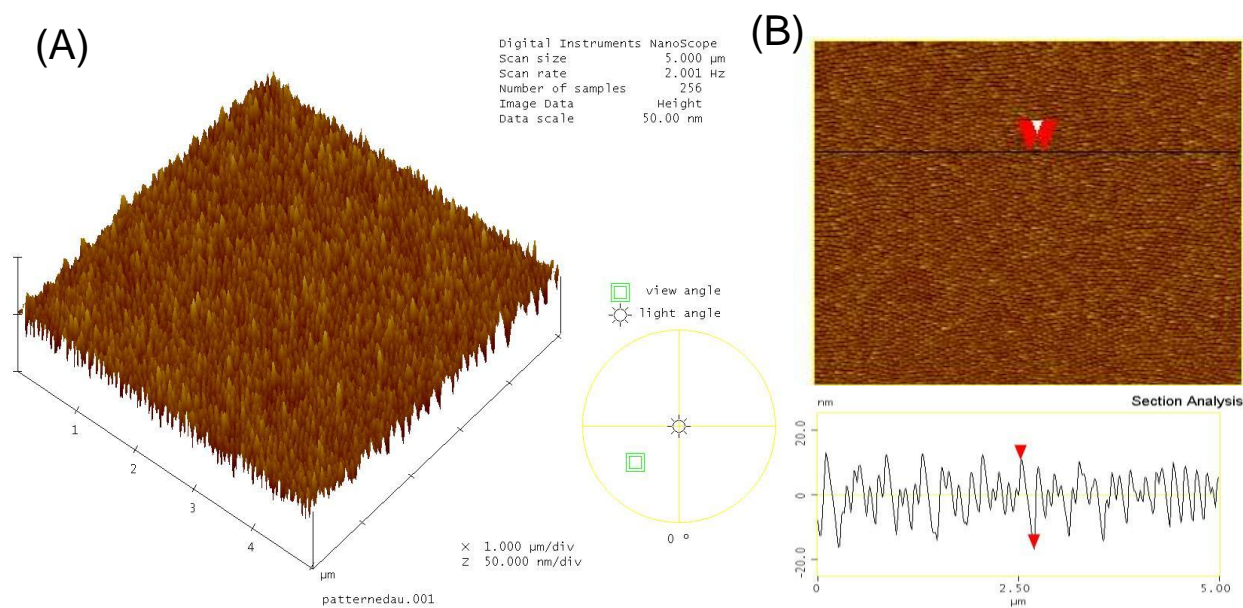

**Fig. S1** Tapping mode AFM images ( $5 \times 5 \mu\text{m}^2$ ) of surface-attached gold nanoparticle arrays on Si substrate (A) surface topography, and (B) section analysis.

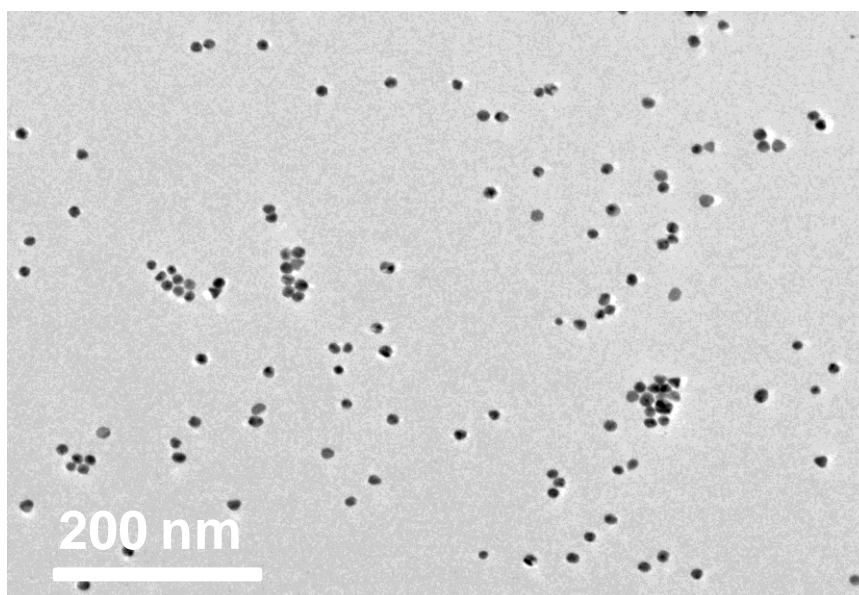

**Fig. S2** Transmission electron microscope (TEM) image of pre-formed gold nanoparticles.

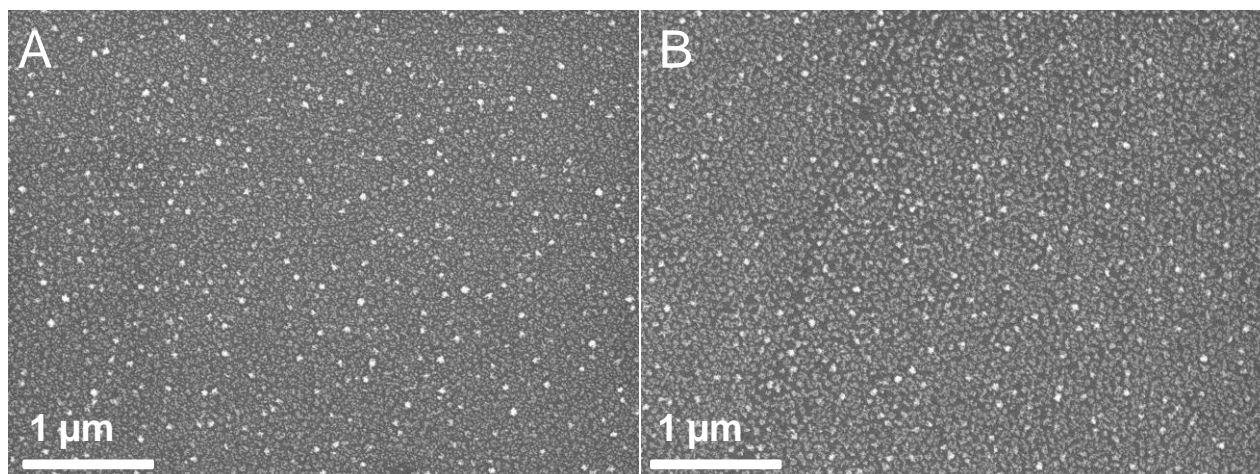

**Fig. S3** FESEM images for 25000 magnification for pre-formed gold nanoparticle clusters on surface-attached gold nanoparticle arrays for (A) 1 h, and (B) 6 h incubations.

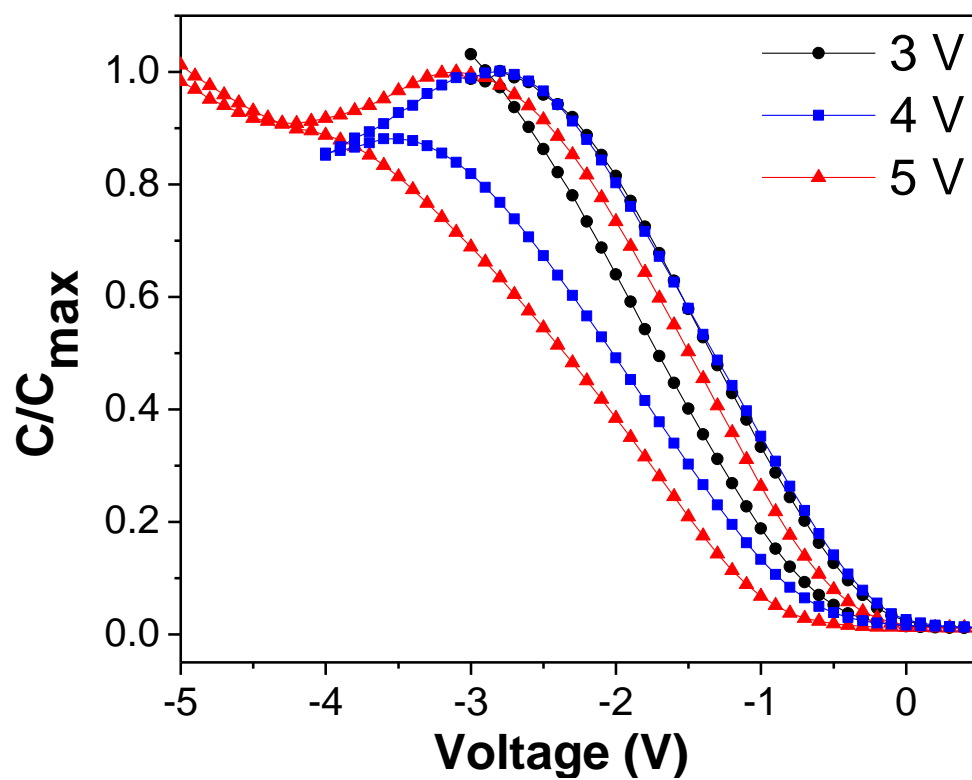

**Fig. S4** Normalized C-V characteristics at 100 kHz under different scan voltage ranges for pre-formed gold nanoparticle clusters on surface-attached gold nanoparticle arrays for 1 h incubation.
